# Supplementary material
Source: publisher figshare collection journal article supplement (https://acs.figshare.com/ndownloader/files/4710439)

Supporting Information for:

**Figure S 1.** Variable angle FTIR of VTS fibers on Si substrate taken with Si background. Angle was set to 75° to the surface with 90° polarization of beam.

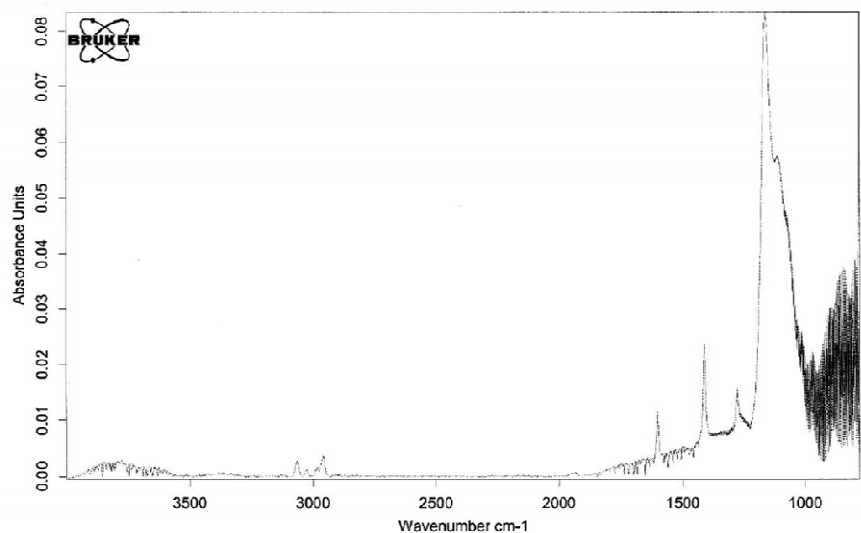

**Figure S 2.** TOF-SIMS spectra of both polarities taken of VTS fibers prepared on Si substrates.

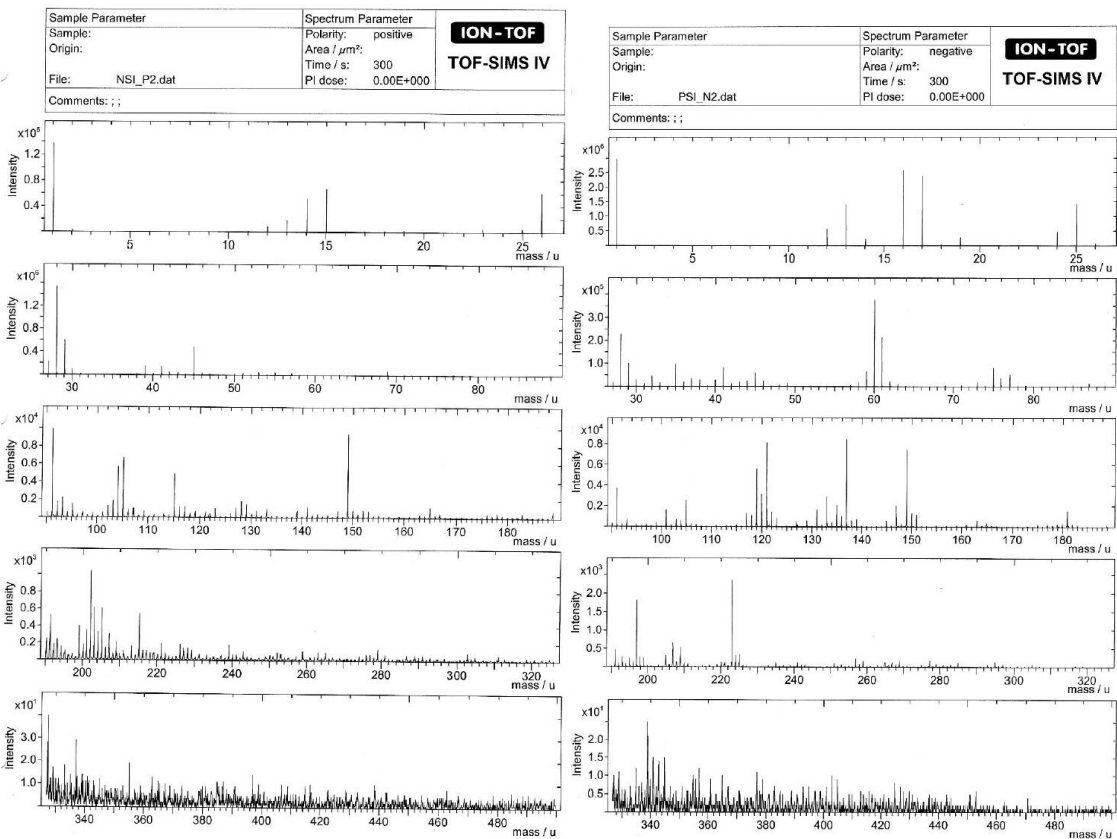

**Figure S 3.** Positively and negatively charged fragments with mass/charge ratios corresponding to TOF-SIMS spectra presented above.

| m/e <sup>-</sup> | fragment                                                                            |
|------------------|-------------------------------------------------------------------------------------|
| 15               | <sup>3+</sup> SiOH                                                                  |
| 45               | 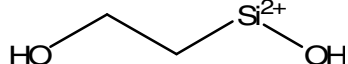   |
| m/e <sup>-</sup> | fragment                                                                            |
| 17               | <sup>-</sup> OH                                                                     |
| 25               |   |
| 60               |   |
| 61               |   |
| 121              |  |

**Figure S 4.** Survey XPS of VTS fibers clearly showing the presence of carbon, silicon and oxygen.

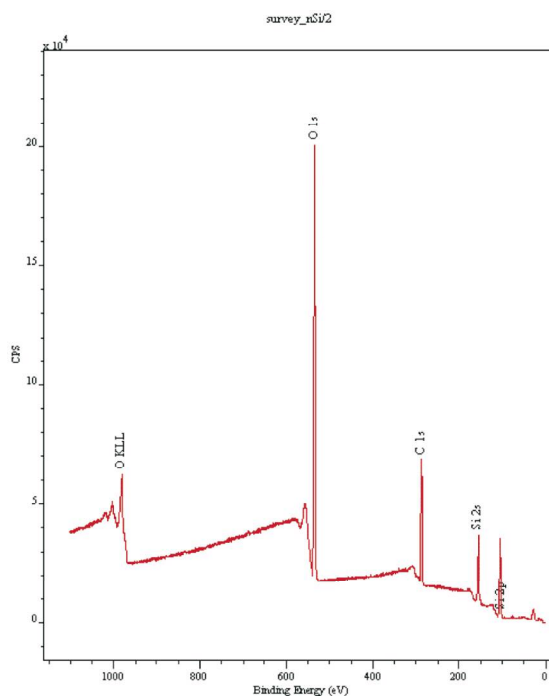

Supplement: Supplementary file 1 [file 4710439]
